# Supplementary material
Source: publisher figshare collection journal article supplement (https://future-science-group.figshare.com/articles/dataset/_/23514564)
Supplement: Supplementary file 1 [file 1]

**Supplementary table 1 Laboratory values.**

| White blood cells [4.8-10.8 k/mm3] | 5.26 k/mm3 |
| --- | --- |
| Neutrophils [40-76%] | 76% |
| Lymphocytes [17-50%] | 12% |
| Monocytes [0-11%] | 8% |
| Eosinophils [0-5%] | 0% |
| Basophils [0-2%] | 0% |
| Atypical Lympocytes [0%] | 4% |
| Hemoglobin [12-16 g/dL] | 11.6 g/dL |
| Platelets [160-410 k/mm3] | 31 k/mm3 |
| Troponin I 1st [<0.03 ng/mL] | 0.620 ng/mL |
| Troponin I 2nd (peak) | 9.03 ng/mL |
| Troponin I 3rd | 7.37 ng/mL |
| B-type natriuretic peptide [<100 pg/mL) | 312 pg/mL |
| CD4 during hospitalization [425-1575 cells/mm3] | 166 cells/mm3 |
| CD4 prior to hospitalization | 374 cells/mm3 |
| CD4 after discharge | 346 cells/mm3 |
| HIV viral load [<20 copies/MI] | < 20 copies/MI |
| Creatinine [0.57-1.11 mg/dL] | 1.07 mg/dL |
| Aspartate aminotransferase [4-35 U/L] | 59 U/L |
| Alanine aminotransferase [6-55 U/L] | 59 U/L |
| Alkaline phosphatase [40-150 U/L] | 124 U/L |
| Total bilirubin [0.2-1.3 mg/dL] | 4.3 mg/dL |
| Amylase (30-110 U/L) | 93 U/L |
| Lipase on day 1 (23-300 U/L) | 333 U/L |
| Lipase on day 2 (23-300 U/L) | 128 U/L |
| Lactic acid [0.5-2 mmol/L] | 1.6 mmol/L |
| Procalcitonin [0.02-0.09 ng/mL] | 2.36 ng/mL |
| Ferritin [18-370 ug/L] | 5062.8 ug/L |
| C-reactive protein [0-0.5 mg/dL] | 39.00 mg/dL |
| Sedimentation rate [0-20 mm/h] | 107 mm/h |
| Fibrinogen [200-400 mg/dL] | >600 mg/dL |
| Triglyceride [30-200 mg/dL] | 349 mg/dL |
| Anaplasma (HGE, Ehrlichia) smear | positive |
| Babesia PCR | negative |
| Parasite smear | No blood parasites seen on thick/thin smear |
| Lyme EIA ( IgG/IgM) | <0.9 (negative) |
| Influenza A | Not detected |
| Influenza B | Not detected |
| RSV | Not detected |
| SARS-COV-2 RNA RT-PCR | Not detected |
